# Supplementary material
Source: PubMed Central journal article supplement (PMC8425619)
Supplement: CJN.03700321SupplementaryData.pdf [file CJN.03700321SupplementaryData.pdf]

## **Supplemental data**

### Table of contents

Supplemental Table 1

Supplemental Table 2

Supplemental Table 3

Supplemental Figure 1

**Supplemental Table 1.** Exclusion and inclusion criteria

| <b>Inclusion criteria</b>       | <b>Exclusion criteria</b>                    |
|---------------------------------|----------------------------------------------|
| >18 years old                   | Active malignoma                             |
| Hemodialysis >1 year (HD group) | Immunosuppressive treatment                  |
| Vaccination with BNT162b2       | Chronic liver disease (> Child-Pugh Score A) |
|                                 | Chronic kidney disease (> CKD 3A) (HC)       |

HC, healthy controls; HD, hemodialysis

**Supplemental Table 2.** Cutoff values of the SARS-CoV-2 specific bead-based multiplex assay

| <b>Target antigens</b>              | <b>Cutoff values (MFI)</b> |
|-------------------------------------|----------------------------|
| SARS-CoV-2 Full Spike Protein       | 7500                       |
| SARS-CoV-2 S1 Protein               | 4000                       |
| SARS-CoV-2 RBD of the Spike Protein | 5500                       |
| SARS-CoV-2 S2 Protein               | 3500                       |
| SARS-CoV-2 NC Protein               | 7500                       |
| HCoV-229E S1 Protein                | 5568                       |
| HCoV-HKU1 S1 Protein                | 4251                       |
| HCoV-NL63 S1 Protein                | 1927                       |
| HCoV-OC43 S1 Protein                | 5685                       |
| MERS-CoV S1 Protein                 | 17                         |
| SARS-CoV S1 Protein                 | 135                        |

HD, hemodialysis; MFI, mean fluorescence intensity; NC, nucleocapsid; RBD, receptor binding domain; S, spike

**Supplemental Table 3.** Optical density values of the SARS-CoV-2 virus neutralizing assay

Optical density values after the first vaccination

| N  | Healthy controls      |              | Dialysis patients     |              |
|----|-----------------------|--------------|-----------------------|--------------|
|    | Optical density value | Inhibition % | Optical density value | Inhibition % |
| 1  | 1.853                 | 37.8         | 2.908                 | 2.3          |
| 2  | 0.857                 | 71.2         | 1.010                 | 66.2         |
| 3  | 0.881                 | 70.4         | 2.929                 | 1.6          |
| 4  | 0.871                 | 70.8         | 2.745                 | 7.8          |
| 5  | 0.524                 | 82.4         | 2.262                 | 24.0         |
| 6  | 1.173                 | 60.6         | 2.888                 | 3.0          |
| 7  | 0.889                 | 70.1         | 0.818                 | 72.5         |
| 8  | 1.129                 | 62.1         | 2.325                 | 21.9         |
| 9  | 1.121                 | 62.4         | 2.400                 | 19.4         |
| 10 | 1.081                 | 63.7         | 2.044                 | 31.4         |
| 11 | 1.084                 | 63.6         | 1.677                 | 43.7         |
| 12 | 0.953                 | 68.0         | 2.661                 | 10.6         |
| 13 | 1.604                 | 46.1         | 3.108                 | 0            |
| 14 | 1.625                 | 45.4         | 2.256                 | 24.2         |
| 15 | 0.933                 | 68.7         | 2.665                 | 10.5         |
| 16 | 0.857                 | 71.2         | 2.520                 | 15.4         |

|    |       |      |       |      |
|----|-------|------|-------|------|
| 17 | 1.452 | 51.2 | 2.751 | 7.6  |
| 18 | 0.735 | 75.3 | 2.876 | 3.4  |
| 19 | 1.012 | 66.0 | 2.767 | 7.1  |
| 20 | 0.168 | 94.4 | 3.167 | 0    |
| 21 | 1.061 | 64.4 | 2.878 | 3.3  |
| 22 | 0.473 | 84.1 | 2.250 | 24.4 |
| 23 | 0.684 | 77.0 |       |      |
| 24 | 1.248 | 58.1 |       |      |
| 25 | 1.557 | 47.7 |       |      |
| 26 | 0.444 | 85.1 |       |      |
| 27 | 0.091 | 97.0 |       |      |
| 28 | 2.244 | 24.6 |       |      |
| 29 | 0.726 | 75.6 |       |      |
| 30 | 0.664 | 77.7 |       |      |
| 31 | 1.072 | 64.0 |       |      |
| 32 | 0.924 | 69.0 |       |      |
| 33 | 0.933 | 68.7 |       |      |
| 34 | 1.539 | 48.3 |       |      |
| 35 | 0.358 | 88.0 |       |      |
| 36 | 0.761 | 74.4 |       |      |
| 37 | 1.882 | 37.0 |       |      |
| 38 | 0.711 | 76.1 |       |      |
| 39 | 2.707 | 9.1  |       |      |
| 40 | 2.822 | 5.2  |       |      |

|    |       |      |  |  |
|----|-------|------|--|--|
| 41 | 1.473 | 50.5 |  |  |
| 42 | 1.084 | 63.6 |  |  |
| 43 | 1.700 | 42.9 |  |  |
| 44 | 1.520 | 49.0 |  |  |
| 45 | 1.651 | 43.7 |  |  |
| 46 | 0.205 | 92.1 |  |  |

Optical density values after the second vaccination

|    | Healthy controls      |              | Dialysis patients     |              |
|----|-----------------------|--------------|-----------------------|--------------|
| N  | Optical density value | Inhibition % | Optical density value | Inhibition % |
| 1  | 0.238                 | 92.7         | 2.255                 | 30.5         |
| 2  | 0.077                 | 97.7         | 0.122                 | 96.2         |
| 3  | 0.145                 | 95.5         | 2.041                 | 37.1         |
| 4  | 0.057                 | 98.2         | 2.520                 | 22.4         |
| 5  | 0.082                 | 97.5         | 0.132                 | 95.9         |
| 6  | 0.051                 | 98.4         | 2.945                 | 9.3          |
| 7  | 0.062                 | 98.1         | 0.064                 | 98.0         |
| 8  | 0.079                 | 97.6         | 1.699                 | 47.7         |
| 9  | 0.052                 | 98.4         | 1.602                 | 50.7         |
| 10 | 0.299                 | 90.8         | 0.643                 | 80.2         |
| 11 | 0.270                 | 91.7         | 0.240                 | 92.6         |

|    |       |      |       |      |
|----|-------|------|-------|------|
| 12 | 0.057 | 98.3 | 2.390 | 26.4 |
| 13 | 0.077 | 97.6 | 2.183 | 32.8 |
| 14 | 0.051 | 98.4 | 1.256 | 61.3 |
| 15 | 0.133 | 95.9 | 1.850 | 43.0 |
| 16 | 0.062 | 98.1 | 0.989 | 67.2 |
| 17 | 0.056 | 98.3 | 0.712 | 72.5 |
| 18 | 0.112 | 96.6 |       |      |
| 19 | 0.067 | 98.0 |       |      |
| 20 | 0.078 | 97.6 |       |      |
| 21 | 0.086 | 97.4 |       |      |
| 22 | 0.085 | 97.4 |       |      |
| 23 | 0.068 | 97.9 |       |      |
| 24 | 0.072 | 97.8 |       |      |
| 25 | 0.104 | 96.8 |       |      |
| 26 | 0.178 | 94.5 |       |      |
| 27 | 0.062 | 98.1 |       |      |
| 28 | 0.073 | 97.8 |       |      |
| 29 | 0.062 | 98.1 |       |      |
| 30 | 0.077 | 97.6 |       |      |
| 31 | 0.079 | 97.6 |       |      |
| 32 | 0.356 | 88.0 |       |      |

|    |       |      |  |  |
|----|-------|------|--|--|
| 33 | 0.049 | 98.4 |  |  |
| 34 | 0.063 | 97.9 |  |  |
| 35 | 0.047 | 98.4 |  |  |
| 36 | 0.070 | 97.7 |  |  |
| 37 | 0.072 | 97.6 |  |  |
| 38 | 0.057 | 98.1 |  |  |
| 39 | 1.005 | 66.6 |  |  |
| 40 | 0.413 | 85.8 |  |  |
| 41 | 0.172 | 94.2 |  |  |
| 42 | 0.051 | 98.3 |  |  |
| 43 | 0.083 | 97.2 |  |  |
| 44 | 0.051 | 98.3 |  |  |
| 45 | 0.048 | 98.4 |  |  |
| 46 | 0.064 | 97.9 |  |  |



Supplemental Figure 1

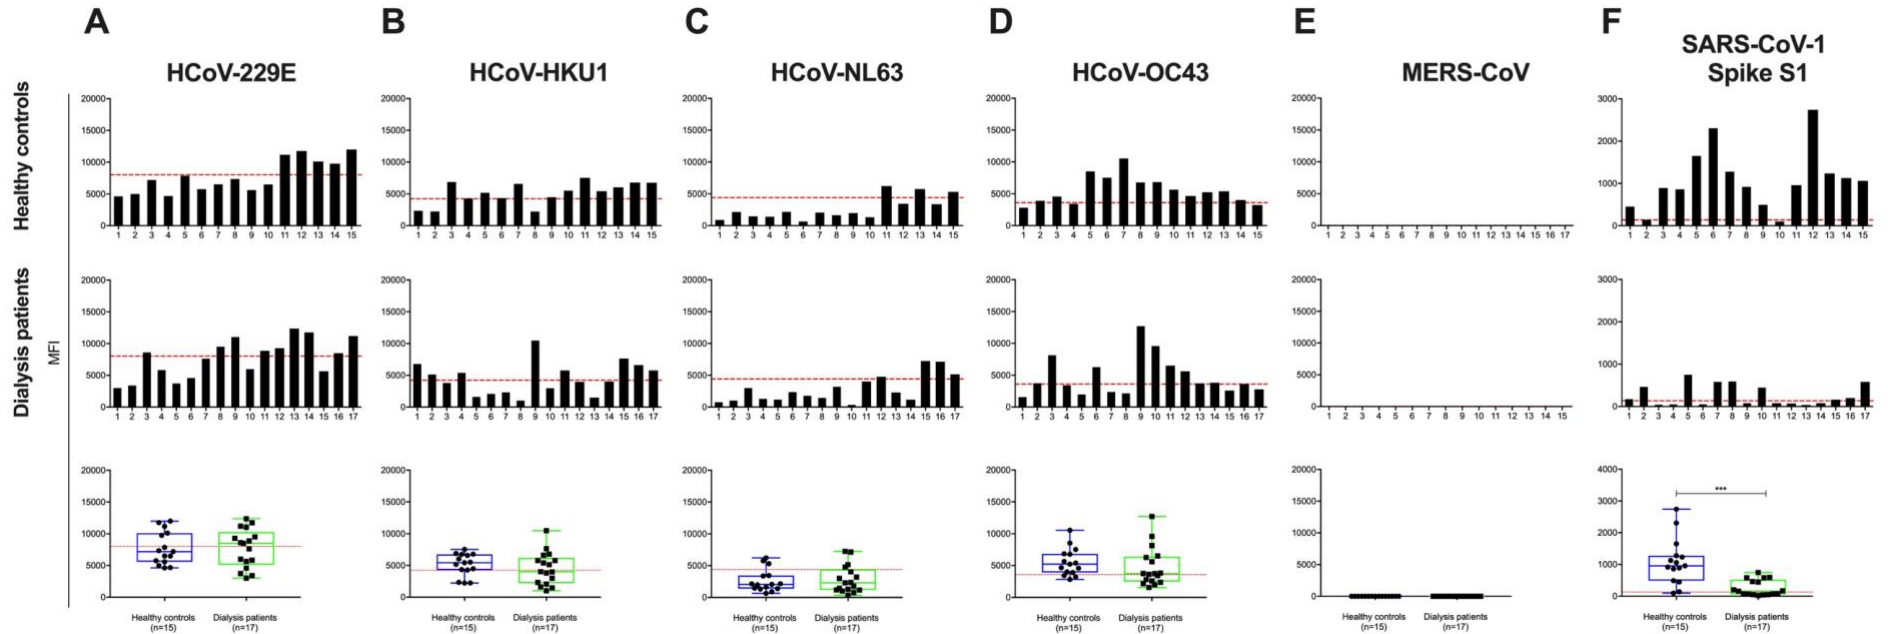

Detection of antibodies against the S1 spike protein of the 4 community coronaviruses HCoV-229E (A), HCoV-HKU1 (B), HCoV-NL63 (C), HCoV-OC43 (D), MERS-CoV (E) and SARS-CoV-1 (F). The x-axis represents the sample number and the y-axis represents the mean fluorescence intensity value of the reactivity. The dashed red line represents the cutoff, respectively.

MERS-CoV, middle-east respiratory syndrome coronavirus
